RESEARCH ARTICLE

# Above- and Belowground Biomass Allocation in Shrub Biomes across the Northeast Tibetan Plateau

Xiuqing Nie<sup>1,2,4</sup>, Yuanhe Yang<sup>3</sup>, Lucun Yang<sup>1,2</sup>, Guoying Zhou<sup>1,2\*</sup>

**1** Northwest Institute of Plateau Biology, Chinese Academy of Science, Xining, 810008, China, **2** Key Laboratory of Tibetan Medicine Research, Chinese Academy of Science, Xining 810008, China, **3** State Key Laboratory of Vegetation and Environmental Change, Institute of Botany, Chinese Academy of Sciences, Beijing, 100093, China, **4** University of Chinese Academy of Science, Beijing, 100049, China

\* [zhougy@nwipb.cas.cn](mailto:zhougy@nwipb.cas.cn)

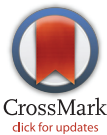

OPEN ACCESS

**Citation:** Nie X, Yang Y, Yang L, Zhou G (2016) Above- and Belowground Biomass Allocation in Shrub Biomes across the Northeast Tibetan Plateau. PLoS ONE 11(4): e0154251. doi:10.1371/journal.pone.0154251

**Editor:** RunGuo Zang, Chinese Academy of Forestry, CHINA

**Received:** December 17, 2015

**Accepted:** April 11, 2016

**Published:** April 27, 2016

**Copyright:** © 2016 Nie et al. This is an open access article distributed under the terms of the [Creative Commons Attribution License](https://creativecommons.org/licenses/by/4.0/), which permits unrestricted use, distribution, and reproduction in any medium, provided the original author and source are credited.

**Data Availability Statement:** All relevant data are within the paper and its Supporting Information files.

**Funding:** This study was supported by the “National Program on Key Basic Research Project” (grant number 2012CB026105), “National Science and Technology Support Project” (grant number 2014BAC05B01; <https://168.160.10.98/sbksdy/#>), “Strategic Priority Research Program” of CAS (grant number XDA05050303) and “National Natural Science Foundation of China” (grant number 40801076; <http://isisn.nsf.gov.cn/egrantindex/funcindex/prjsearch-list>). All funding was received by Guoying Zhou. The funders had no role in study

## Abstract

Biomass partitioning has been explored across various biomes. However, the strategies of allocation in plants still remain contentious. This study investigated allocation patterns of above- and belowground biomass at the community level, using biomass survey from the Tibetan Plateau. We explored above- and belowground biomass by conducting three consecutive sampling campaigns across shrub biomes on the northeast Tibetan Plateau during 2011–2013. We then documented the above-ground biomass (AGB), below-ground biomass (BGB) and root: shoot ratio (R/S) and the relationships between R/S and environment factors using data from 201 plots surveyed from 67 sites. We further examined relationships between above-ground and below-ground biomass across various shrub types. Our results indicated that the median values of AGB, BGB, and R/S in Tibetan shrub were 1102.55, 874.91 g m<sup>-2</sup>, and 0.85, respectively. R/S showed significant trend with mean annual precipitation (MAP), while decreased with mean annual temperature (MAT). Reduced major axis analysis indicated that the slope of the log-log relationship between above- and below-ground biomass revealed a significant difference from 1.0 over space, supporting the optimal hypothesis. Interestingly, the slopes of the allometric relationship between log AGB and log BGB differed significantly between alpine and desert shrub. Our findings supported the optimal theory of above- and belowground biomass partitioning in Tibetan shrub, while the isometric hypothesis for alpine shrub at the community level.

## Introduction

Root: shoot ratio (R/S) is one of the most common descriptors of the relationship between root and shoot biomass, which has become a key method for estimating below-ground biomass (BGB) from above-ground biomass (AGB). The partitioning of above- and belowground biomass is a core parameter of carbon cycling in terrestrial biomes [1,2]. From a physiological perspective, R/S has been interpreted as a critical parameter as reflecting the differential

design, data collection and analysis, decision to publish, or preparation of the manuscript.

**Competing Interests:** The authors have declared that no competing interests exist.

investment of photosynthates between the aboveground and belowground organs [3,4]. Therefore, quantifying this ratio and its relationships with climatic factors can not only improve the accuracy of root biomass estimates, but also be important for mechanistic understanding of terrestrial carbon cycles [2–5].

Biomass partitioning is usually explained by isometric and optimal hypotheses [6–8]. The isometric allocation hypothesis suggests that the slope of the log-log relationship between above AGB and BGB is not significantly different from 1.0 and does not show any significant change with environment conditions [9,10]. Compared with this hypothesis, the optimal hypothesis indicates that plants respond to variation in environment conditions by allocation biomass among various organs to capture nutrients, water, and light to maximize their growth rate [9,11,12]. Biomass partitioning has been widely examined across various biomes [2–5,9,13–18]. However, the strategies of allocation in plants still remain contentious [10,14–19]. For grasslands, the biomass partitioning relationship of AGB and BGB fits isometric hypothesis in community type from Tibetan Plateau to China [8,9], while there are also evidences that reflect the allometric biomass partitioning relationship on the Tibetan Plateau and patterns of biomass allocation in China's grasslands also do not fit the isometric hypothesis from individual-level observations [16]. In forest ecosystems, evidences from temporal observations demonstrate the isometric biomass partitioning hypothesis [18]. Nevertheless, optimal partitioning patterns exist both intraspecifically and interspecifically for arboreal conifers [8]. Previous studies shed light on how plants adjust C allocation across various biomes, yet, it is less involved in shrubs. Some previous studies assessed biomass allocation of shrubs are mainly focused on individual levels [20–22], and are not only proven the isometric biomass partitioning relationship [20,21] but also exist the allometry hypothesis [20,22], and they are less to research at communities level. Furthermore, allocation relationships between log AGB and log BGB is unknown in the northeast Tibetan Plateau shrub biomes.

In this study, we evaluated AGB and BGB allocation in the Tibetan Plateau shrub biomes. To this end, we conducted a regional sampling survey during the 2011–2013 and sampled 201 sites across the northeast Tibetan Plateau. We then determined AGB and BGB for those samples. Using these datasets, we examined relationships between R/S and climatic factors, and also explored the hypothesis of biomass allocation. Overall, this study aimed to answer the following questions: (1) How climatic factors effect biomass allocation? (2) What is the relationship between AGB and BGB in shrub biomes across the northeast Tibetan Plateau?

## Materials and Methods

### Study area

The study area covered with shrubs on the northeast Tibetan Plateau, extending from latitudes of 31°52'33.92" to 38°05'09.15" N and longitudes of 94°30'38.50" to 102°22'33.94" E (S1 Table). Shrubs are one of the most important biomes in study area [23] and dominantly consisted of woody plants in ecosystem, with the average of height below 5m, and the coverage more than both 30% and 40% [24]. Alpine shrubs and desert shrubs are predominant biomes in shrub ecosystem across northeast Tibetan Plateau [23]. Alpine shrubs occur at the wet regions and can endure cold and semiarid environments, such as *Potentilla fruticosa* Linn, *Rhododendron thymifolium* Maxim, *Sibiraea laevigata* (Linn) Maxim and *Rhododendron capitatum* Maxim biomes, while desert shrubs are distributed at drier areas and prevailingly consist of plants can bear severe drought, such as *Nitraria tangutorum* Bobr, *Kalidium foliatum* (Pall.) Moq, *Salsola abrotanoides* Bunge and *Sympegma ragelii* Bunge biomes [23]. The mean annual temperature and mean annual precipitation of the study area range from -5.6 to 8.9°C and from 17.6 to 764.4 mm, separately [25].

## Field biomass survey

We systematically selected 201 plots surveyed from 67 sites across the northeast Tibetan Plateau during the summers (July to August) from 2011–2013. In each site, no specific permits were demanded for collecting samples and the field studies did not involve endangered or protected species. The plots were 5 m × 5 m for alpine shrub and 10 m × 10 m for desert shrub. There are three plots in each site and the distance of two plots was between 5 and 50 m. In each plot, we set a subplot (1 m × 1 m), and all shrub plants in three subplots (1 m × 1 m) were harvested to measure AGB [26]. Each corresponding subplot was excavated until the maximum root depth, which were sampled to determine BGB. Root samples were soaked in water. Dead roots were removed [14] and live roots were distinguished by their color, consistency and attached fine roots [27]. Live shoot and root biomass were used oven-dried at 65°C to constant weight, and weighed to the nearest 0.01 g, and used to evaluate biomass partitioning patterns and their relationships with climatic variables [4,5].

## Data analysis

First, due to their log-normal distributions of raw biomass data, we calculated the median values of AGB, BGB, and R/S for all sampling sites. We then classified all sites from alpine shrub to desert shrub. We calculated overall AGB, BGB, and R/S for the two types of shrub biomes on the Tibetan Plateau.

Second, to investigate the potential effects of climatic factors on R/S, mean annual temperature (MAT) and mean annual precipitation (MAP) were extracted for each site from the worldclim database (<http://www.worldclim.org/>) with a spatial resolution of 1 × 1 km<sup>2</sup> [28–30].

Third, the relationship between log-transformed above- and belowground biomass was explored by Ordinary least squares (OLS) analyses and reduced major axis (RMA) analyses [31,32]. The slope ( $\alpha$ ) and  $y$ -intercept ( $\log\beta$ ) of log–log linear functions for RMA were determined by the software package ‘Standardized Major Axis Tests and Routines’ [33].

## Results

### Size of AGB, BGB and R/S

AGB, BGB and R/S exhibited large variations across all the sites, ranging from 340.34 to 14623.12 g m<sup>-2</sup> for AGB, while BGB ranged from 89.36 to 8565.27 g m<sup>-2</sup> and R/S ranged from 0.13 to 2.51 (Fig 1). The median values of AGB for alpine shrub and desert shrub were 1036.36 and 1194.36 g m<sup>-2</sup> separately. The median values of BGB for alpine shrub and desert shrub were 951.55 and 603.36 g m<sup>-2</sup>. And the median values of R/S of alpine shrub and desert shrub were 0.95 and 0.44 (Table 1). The mean values of AGB, BGB, and R/S for shrub (alpine shrub and desert shrub) were 1492.27, 1146.85 g m<sup>-2</sup> and 0.86, respectively (Fig 1).

### Effects of MAT, MAP on R/S

The R/S in Tibetan shrubs dropped significantly with increasing in MAT ( $r^2 = 0.08$ ,  $p < 0.05$  Fig 2A), while showed significantly positive trend with MAP ( $r^2 = 0.12$ ,  $p < 0.05$  Fig 2B).

### Allometric relationships between AGB and BGB

The slope ( $\alpha$ ) of the allometric relationship between log AGB and log BGB for overall shrubs was 0.61, with 95% confidence interval of 0.46–0.75 (Fig 3A), which was significant different from the isometric relationships. Furthermore, AGB in desert shrubs scales with BGB in a

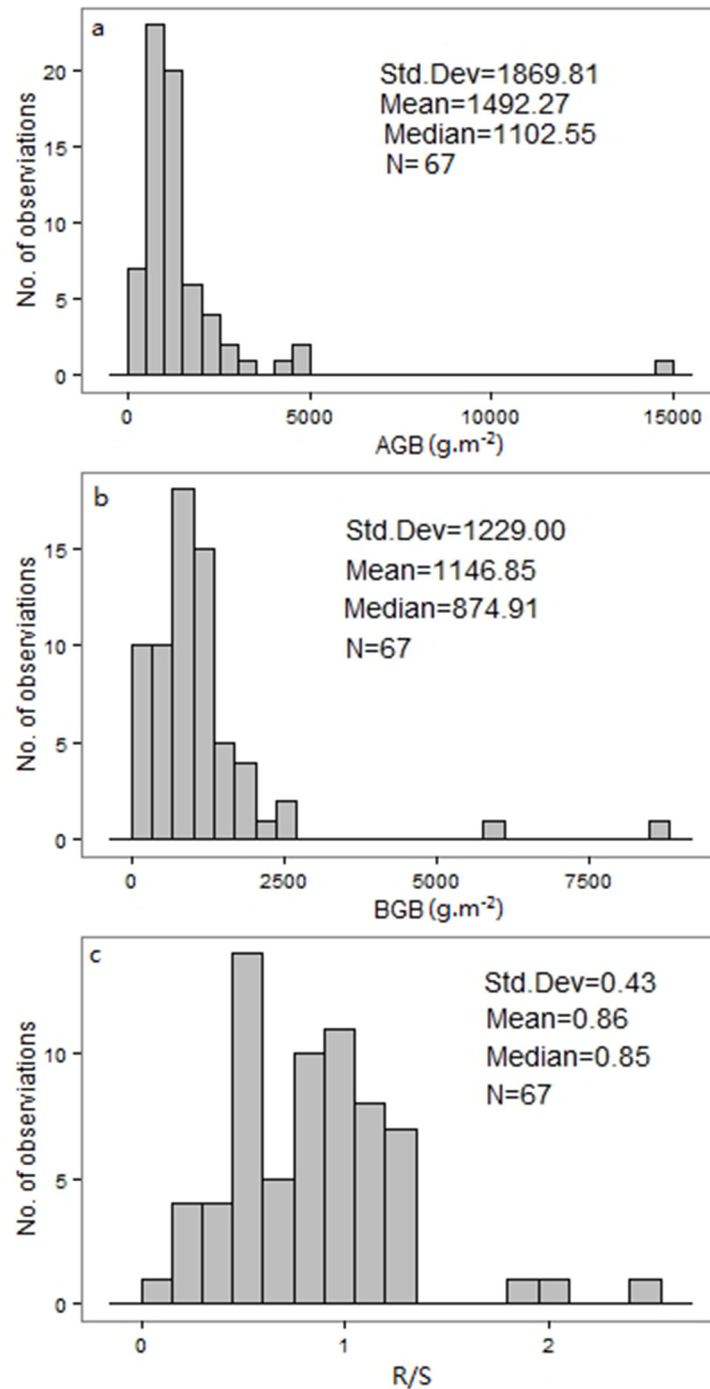

**Fig 1. Frequency distributions of (a) above-ground biomass (AGB), (b) below-ground biomass (BGB), and (c) root:shoot ratio (R/S) in shrub.** Their mean values, median values, Std. Dev and N are presented.

doi:10.1371/journal.pone.0154251.g001

different manner to alpine shrubs. The allocation of biomass in the alpine shrubs was supported by isometric hypothesis while the relationship in desert shrubs was supported by allometric allocation hypothesis (Fig 3B).

**Table 1. The median values of above-ground biomass (AGB), below-ground biomass (BGB) and root: shoot ratio (R/S) for various shrub types on the Tibetan Plateau.**

| Shrub types  | AGB (g m <sup>-2</sup> ) |                 | BGB (g m <sup>-2</sup> ) |                | R/S    |           | n  |
|--------------|--------------------------|-----------------|--------------------------|----------------|--------|-----------|----|
|              | Median                   | Range           | Median                   | Range          | Median | Range     |    |
| Alpine shrub | 1036.36                  | 340.34–4816.52  | 951.55                   | 170.21–2597.28 | 0.95   | 0.45–2.02 | 49 |
| Desert shrub | 1194.36                  | 426.03–14623.12 | 603.36                   | 89.36–8565.27  | 0.44   | 0.13–2.51 | 18 |
| Overall      | 1102.55                  | 340.43–14623.12 | 874.91                   | 89.36–8565.27  | 0.86   | 0.13–2.51 | 67 |

doi:10.1371/journal.pone.0154251.t001

## Discussion

### Size of R/S

The median R/S is 1.84 in global shrubs [4], which is larger than that in shrub biomes across the northeast Tibetan Plateau. Furthermore, the average R/S is 1.2 in global sclerophyllous shrubs [5], which is also higher than desert shrub and alpine shrubs on the Tibetan Plateau. What is responsible for this difference? From a physiological perspective, R/S has been interpreted as reflecting the different investment of photosynthates between aboveground and belowground organs [3]. Then, compared with R/S ratios in global regions, shrubs in Tibetan Plateau allocate more biomass to AGB. It has been proven that the growing season of plant is shorted [34] and the CO<sub>2</sub> partial pressure markedly decreases [35,36] with the increasing altitude, which may undermine the maximum photosynthetic rate [37]. As plants generally allocate biomass to the organs that acquire the most limiting resource [8]. Thus, the plant growing at high altitude may attend to invest more biomass to AGB for obtaining higher photosynthetic rate to adapt on the Tibetan Plateau. To explore whether grasslands have the same characteristic, we compared R/S on the Tibetan Plateau with that on the Inner Mongolia, China. We found that R/S of grasslands on the Tibetan Plateau is 5.8 [9] and smaller than that on the Inner Mongolia, which is 6.3 [38]. These phenomena demonstrate that the botany on the Tibetan Plateau may tend to allocate more photosynthates to aboveground organs to fit the maximizing growing capacity.

### Relationships between climatic factors on biomass partitioning

The R/S in Tibetan shrubs dropped significantly with increasing in MAT ( $r^2 = 0.08$ ,  $p < 0.05$  Fig 2A). This deduction was similar to the significant decreasing trend of R/S with increasing

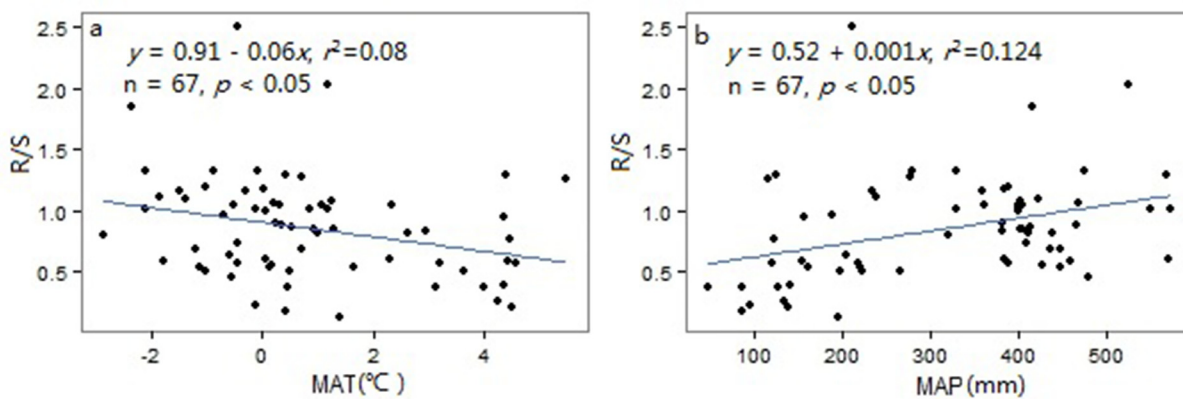

**Fig 2. Relationships of root: shoot ratio (R/S) with climatic factors for shrub biomes on the Tibetan Plateau.** (a, b) R/S vs. MAT, mean annual temperature, MAP, mean annual precipitation.

doi:10.1371/journal.pone.0154251.g002

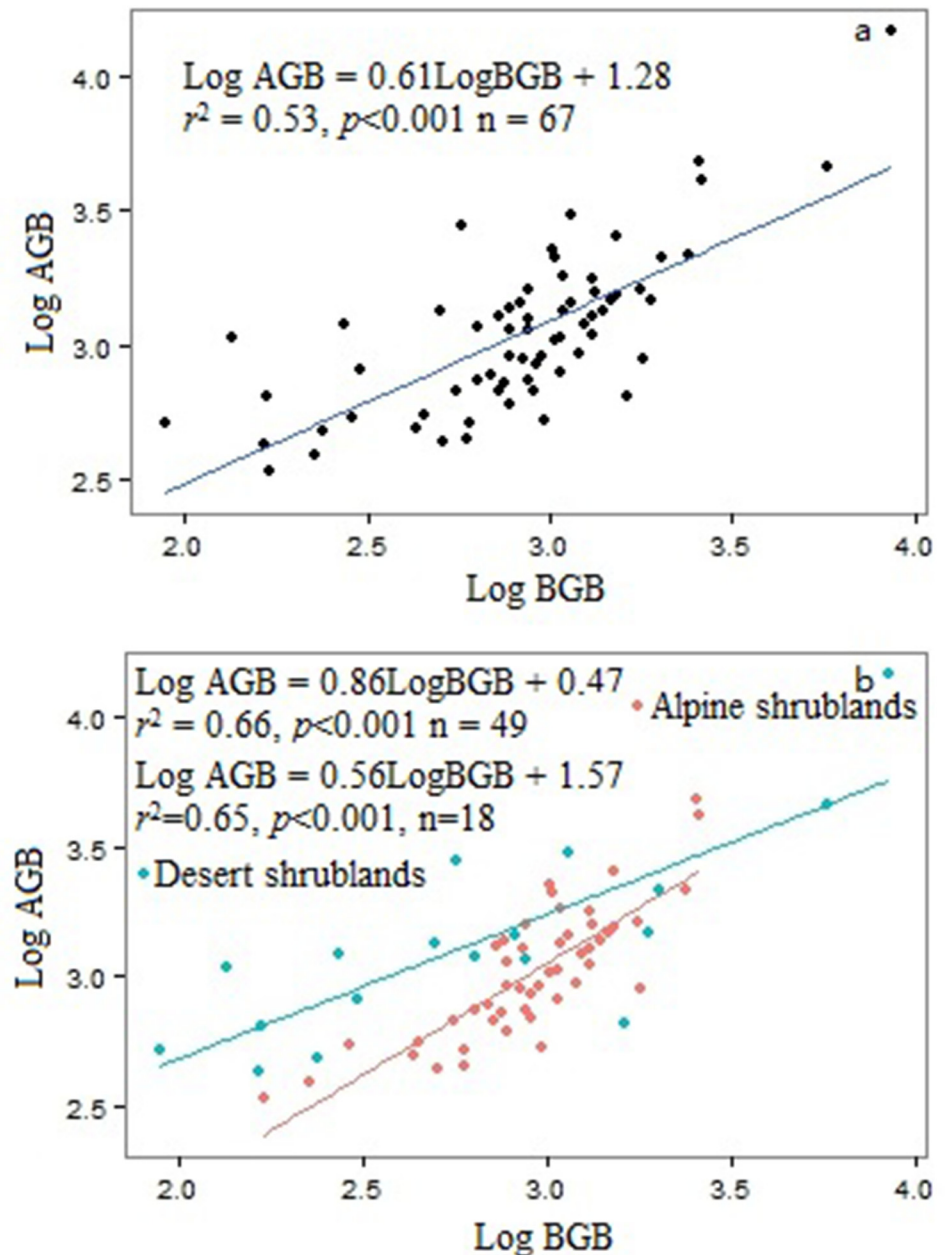

**Fig 3. Relationships between above-ground biomass (AGB) and below-ground biomass (BGB) in Tibetan Plateau shrubs.** (a): the slope of the relationship between log AGB and log BGB for overall shrub was 0.61, with 95% confidence intervals of 0.46–0.75. (b): the red line denotes the allocation relationship for alpine shrubs, while the green line indicates the relationship for desert shrubs. The 95% confidence intervals of the slopes for alpine shrubs and desert shrubs were 0.68–1.04 and 0.34–0.78, respectively.

doi:10.1371/journal.pone.0154251.g003

temperature [2,4] and global grasslands, but different from the trend of China’s grasslands [14]. The higher R/S in regions might be slower root turnover in colder regions [39], and also could be associated with the relatively slow depletion of carbohydrates in roots, resulting from low respiration rates in cold regions [40]. Consequently, R/S may be significantly negative correlation with MAT. The R/S in our study showed a significantly positive trend with MAP ( $r^2 = 0.12, p < 0.05$  Fig 2B). This result was opposite to the relationships in global shrubs and



grasslands [4] and different that R/S in China's grasslands did not show any significant trend with MAP [14]. In northeast Tibetan Plateau shrubs, MAP was negatively correlated with MAT ( $r = -0.4, p < 0.05$ ). Therefore, with increasing precipitation, temperature would be lower, which may lead to increase of R/S. Furthermore, different water use efficiency might be derived from the differences in vegetational and biogeochemical constraints [41,42], which may lead to a more efficiency use of precipitation in BGB across Tibetan Plateau shrubs.

## Allometric relationships between AGB and BGB

The allocation of biomass in alpine shrubs is supported by isometric hypothesis while it is supported by allometric allocation hypothesis in desert shrubs. In the harsh ecosystems, scarce precipitation allows plants to allocate more biomass to the aboveground organs, which is favour for plants to survive [13,17]. Therefore, biomass allocation in the desert shrub and alpine shrubs may support the different allocation hypothesis. Similarly, Wu et al. (2013) reported that in the more rough Tibetan Plateau alpine steppe ecosystem, the relationship between BGB and AGB supports the allometric biomass partitioning hypothesis [17], while biomass allocation in the alpine grasslands reflects the isometric allocation hypothesis [9].

Considering the aboveground biomass and belowground biomass in Tibetan Plateau grasslands allocation is supported by isometric hypothesis [9]. Different biomass allocation equations should be considered when estimating belowground biomass from aboveground at different biomes. Though the generality of isometric relationship exists between log AGB and log BGB at the level of woody and non-woody communities [9], we further demonstrated that different biomass allocation hypothesis for particular biomes. Similarly, across the 20 different forest-level regressions in China's forest, which are not statistically distinguishable from the isometric relationship [31], but not all forests fit to isometric relationship, such as temperate mixed coniferous-broadleaf forest, temperate deciduous broadleaf forest [31]. Therefore, the 'universal' exponents do not exist for all biomes and in order to improve the accuracy of root biomass estimates, specific allocation equations should be used for given biomes.

## Conclusion

This study is the first to document information on biomass allocation and the relationships between R/S and climatic factors in shrub biomes on the Tibetan Plateau. We found that R/S was sensitive to MAP and MAT. The AGB in Tibetan Plateau shrub did not scale strikingly with BGB and the slope was significantly different from 1.0. The result supported the optimal relationship and it was similar to desert shrub. Interestingly, the slope of alpine shrub was significantly supporting the isometric relationship. These findings suggest that different biomes allocation equations should be considered when estimating BGB from AGB for different shrub biomes.

## Supporting Information

### **S1 Table. Description of 67 sites in shrub biomes across the northeast Tibetan Plateau.**

Data for latitude, longitude, AGB and BGB.  
(PDF)

## Acknowledgments

We thank Fan Li, Zebing Zhong, Hechun Liu, Yanling Li, Changbin Li, Yi Ning for facilitating our field surveys on the Tibetan Plateau (2011–2013) and for laboratory assistance. We would

also like to thank Dr. Yunfeng Peng and two anonymous reviewers who provided suggestions for improving this manuscript.

## Author Contributions

Conceived and designed the experiments: GYZ LCY. Performed the experiments: GYZ LCY. Analyzed the data: XQN YHY. Contributed reagents/materials/analysis tools: GYZ LCY XQN YHY. Wrote the paper: XQN YHY.

## References

1. Gilmanov TG, Parton WJ, Ojima DS. Testing the 'CENTURY' ecosystem level model on data sets from eight grassland sites in the former USSR representing a wide climate/soil gradient. *Ecol Model.* 1997; 96: 191–210.
2. Hui DF, Jackson RB. Geographical and interannual variability in biomass partitioning in grassland ecosystems: a synthesis of field data. *New Phytol.* 2005; 169: 85–93.
3. Titlyanova AA, Romanova IP, Kosykh NP, Mironycheva-Tokareva NP. Patterns and process in above-ground and below-ground components of grassland ecosystems. *J Veg Sci.* 1999; 10: 307–320.
4. Mokany K, Raison RJ, Prokushkin AS. Critical analysis of root: shoot ratios in terrestrial biomes. *Global Change Biol.* 2006; 11: 1–13.
5. Jackson RB, Canadell J, Ehleringer JR, Mooney HA, Sala OE, Schulze ED. A global analysis of root distributions for terrestrial biomes. *Oecologia.* 1996; 108: 389–411.
6. Müller I, Schmid B, Weiner J. The effect of nutrient availability on biomass allocation patterns in 27 species of herbaceous plants. *Perspect Plant Ecol Evol Syst.* 2000; 3: 115–127.
7. Shipley B, Meziane D. The balanced growth hypothesis and the allometry of leaf and root biomass allocation. *Funct Ecol.* 2002; 16: 326–331.
8. McCarthy MC, Enquist BJ. Consistency between an allometric approach and optimal partitioning theory in global patterns of plant biomass allocation. *Funct Ecol.* 2007; 21: 713–720.
9. Yang YH, Fang JY, Ji CJ, Han WX. Above- and belowground biomass allocation in Tibetan grasslands. *J Veg Sci.* 2009; 20: 177–184.
10. Enquist BJ, Niklas KJ. Global allocation rules for patterns of biomass partitioning across seed plants. *Science.* 2002; 295: 1517–1520. PMID: [11859193](#)
11. Bloom AJ, Chapin FS, Mooney HA. Resource limitation in plants—an economic analogy. *Ann Rev of Ecol Syst.* 1985; 16: 363–392.
12. Chapin FS, Bloom AJ, Field CB, Waring RH. Plant responses to multiple environmental factors. *Bioscience.* 1987; 37: 49–57.
13. Fan JW, Wang K, Harris W, Zhong HP, Hu ZM, Han B, et al. Allocation of vegetation biomass across a climate-related gradient in the grasslands of Inner Mongolia. *J Arid Environ.* 2009; 73: 521–528.
14. Yang YH, Fang JY, Ma WH, Guo DL, Mohammat A. Large-scale pattern of biomass partitioning across China's grasslands. *Global Ecol Biogeogr.* 2010; 19: 268–277.
15. Ma WL, Shi PL, Li WH, He YT, Zhang XZ, Shen ZX, et al. Changes in individual plant traits and biomass allocation in alpine meadow with elevation variation on the Qinghai-Tibetan Plateau. *Sci China Life Sci.* 2010; 53: 1142–1151. doi: [10.1007/s11427-010-4054-9](#) PMID: [21104375](#)
16. Wang L, Niu KC, Yang YH, Zhou P. Patterns of biomass allocation in China's grasslands: evidence from individual-level observations. *Sci China Life Sci.* 2010; 40: 642–649.
17. Wu JB, Hong JT, Wang XD, Sun J, Lu XY, Fan JH, et al. Biomass Partitioning and Its Relationship with the Environment Factors at the Alpine Steppe in Northern Tibet. *PLoS ONE.* 2013; 8: e81986. doi: [10.1371/journal.pone.0081986](#) PMID: [24349170](#)
18. Yang YH, Luo YQ. Isometric biomass partitioning pattern in forest ecosystems: evidence from temporal observations during stand development. *J Ecol.* 2011; 99: 431–437.
19. McCaughay KDM, Coleman JS. Biomass allocation in plants: ontogeny or optimality? A test along three resource gradients. *Ecology.* 1999; 80: 2581–2593.
20. Yang HT, Li XR, Liu LC, Jia RL, Wang ZR, Li XJ. Biomass allocation patterns of shrubs in desert grassland. *J Desert Res.* 2013; 33: 1340–1348. (in Chinese with English abstract).
21. Zhao C, Zhang YQ, Qin SG, Lai ZR, Liu JB, Fa KY. NPP and its distribution pattern of three typical sandy shrubs. *J Beijing Fore U.* 2014; 36: 62–67. (in Chinese with English abstract).



22. Niu CY, Alamusa, Zong Q, Luo YM, Toshio O, Sun GF, et al. Allocation patterns of above- and below-ground biomass of *Caragana microphylla* in Horqin Sandy Land, North China. *Chin J Ecol.* 2013; 32: 1980–1986. (in Chinese with English abstract).
23. Zhou XM, Wang ZB, Du Q. *Vegetation of Qinghai, China.* Xining: Qinghai People's Publishing house; 1987. pp. 53–72.
24. Wu ZY. *Vegetation of China.* Beijing: Science Press; 1980. pp. 430.
25. Zhang ZX. *Geography of Qinghai province.* Beijing: Science Press; 2009. pp. 25–26.
26. Fang JY, Wang XP, Shen ZH, Tang ZY, He JS, Yu D, et al. Methods and protocols for plant community inventory. *Biodiv Sci.* 2009; 17: 533–548. (in Chinese with English abstract).
27. Vogt KA, Persson H. Measuring growth and development of roots. *Techniques and approaches in forest tree ecophysiology* (ed. by Lassoie JL and Hinckley TM). Boca Raton: CRC Press; 1991. pp. 477–502.
28. Hijmans RJ, Cameron SE, Parra JL, Jones PG, Jarvis A. Very high resolution interpolated climate surfaces for global land areas. *Int J Climatol.* 2005; 25: 1965–1978.
29. Ma WH, He JS, Yang YH, Wang XP, Liang CZ, Anwar M, et al. Environmental factors covary with plant diversity-productivity relationships among Chinese grassland sites. *Global Ecol Biogeogr.* 2010; 19: 233–243.
30. Yang X, Tang ZY, Ji CJ, Liu HY, Ma WH, Mohhamot A, et al. Scaling of nitrogen and phosphorus across plant organs in shrubland biomes across Northern China. *Sci Rep.* 2014; 4, 5448; doi: [10.1038/srep05448](https://doi.org/10.1038/srep05448) PMID: [24965183](https://pubmed.ncbi.nlm.nih.gov/24965183/)
31. Cheng DL, Niklas KJ. Above- and below-ground biomass relationships across 1534 forested communities. *Ann Bot.* 2007; 99: 95–102. PMID: [17085476](https://pubmed.ncbi.nlm.nih.gov/17085476/)
32. Niklas KJ. Modelling below- and above-ground biomass for non-woody and woody plants. *Ann Bot.* 2005; 95: 315–321. PMID: [15546927](https://pubmed.ncbi.nlm.nih.gov/15546927/)
33. Falster DS, Warton DI, Wright IJ. (2003) (S) MATR: standardized major axis tests and routines. Version 1.0. Available: <http://www.bio.mq.edu.au/ecology/SMATR>. Accessed June 2005.
34. Woodward FI. The climatic control of the altitudinal distribution of *Sedum Rosea* (L.) Scop. and *S. Telephium* L. *New Phytol.* 1975; 74: 335–348.
35. Gale J. Availability of Carbon Dioxide for Photosynthesis at High Altitudes: Theoretical Considerations. *Ecology.* 1972; 53: 494–497.
36. Körner C. The use of 'altitude' in ecological research. *Trends Ecol Evol.* 2007; 22: 569–574. PMID: [17988759](https://pubmed.ncbi.nlm.nih.gov/17988759/)
37. Woodward FI. Ecophysiological studies on the shrub *Vaccinium myrtillus* L. taken from a wide altitudinal range. *Oecologia.* 1986; 70: 580–586.
38. Ma WH, Fang JY. RBS ratios of temperature steppe and environmental controls in Inner Mongolia. *Acta Sci Natur Pku.* 2006; 42: 774–778. (in Chinese with English abstract).
39. Gill RA, Jackson RB. Global patterns of root turnover for terrestrial ecosystems. *New Phytol.* 2000; 147: 13–31.
40. Davidson RL. Effect of root/leaf temperature differentials on root/shoot ratios in some pasture grasses and clover. *Ann Bot.* 1969; 33: 561–569.
41. Paruelo JM, Lauenroth WK, Burke IC, Sala OE. Grassland precipitation-use efficiency varies across a resource gradient. *Ecosystems.* 1999; 2: 64–68.
42. Huxman TE, Smith MD, Fay PA, Knapp AK, Shaw MR, Loik ME, et al. Convergence across biomes to a common rain-use efficiency. *Nature.* 2004; 429: 651–654. PMID: [15190350](https://pubmed.ncbi.nlm.nih.gov/15190350/)
